# Supplementary material
Source: PubMed Central journal article supplement (PMC6628927)

## Supplementary information

**Table S-1. Sequences of the qPCR primers.**

**Table S-2. Identities of LPCs in mice.** The relative abundance of LPCs were decreased in TAA-induced mice whereas recovered by NME.

**Table S-3. Identities of acylcarnitines in mice.** The relative abundance of acylcarnitines were increased in TAA-induced mice whereas recovered by NME.

**Figure. S-1. NME recovered the lysophosphatidylcholines (A) and acylcarnitines (B) metabolism in mouse liver of TAA-induced toxicity.** \* $p < 0.05$  as compared to control group, \*\* $p < 0.01$  as compared to control group, \*\*\* $p < 0.001$  as compared to control group, # $p < 0.05$  as compared to TAA treated group, ## $p < 0.01$  as compared to TAA treated group, ### $p < 0.001$  as compared to TAA treated group.

**Figure. S-2. Tandem MS spectrum of authentic compounds.** (A) 18:0-LPC. (B) 18:1-LPC. (C) 16:0-carnitine. (D) 18:0-carnitine.

**Figure. S-3. (A) Hydrogen peroxide (H<sub>2</sub>O<sub>2</sub>) content in plasma. (B) Relative GSH abundance in plasma.** H<sub>2</sub>O<sub>2</sub> content and the relative GSH abundance were slightly recovered by NME without significant difference. \* $p < 0.05$  as compared to control group.

**Table S-1. Sequences of the qPCR primers.**

| Gene           | Forward (5' to 3')     | Reverse (5' to 3')       |
|----------------|------------------------|--------------------------|
| <i>Actb</i>    | TGTTACCAACTGGGACGACA   | CTGGGTCATCTTTTCACGGT     |
| <i>Nrf2</i>    | TTGGCAGGAGCTATTTTCC    | GAACAGCGGTAGTATCAGC      |
| <i>Sod</i>     | ATGAAAGCGGTGTGCGTG     | TGCTGGCCTTCAGTTAATCC     |
| <i>Nqo1</i>    | TTTCTGTGGCTTCCAGGTCT   | CATCCTTCCAGGATCTGCAT     |
| <i>Gcle</i>    | GGCGATGTTCTTGAGACTCTGC | TTCTTCGATCATGTAACTCCCATA |
| <i>Gclm</i>    | GCCACCAGATTTGACTGCCTTT | CAGGGATGCTTTCTTGAAGAGCTT |
| <i>Gsta2</i>   | TTATGTCCCCCAGACCAAAG   | CCTGTTGCCCACAAGGTAGT     |
| <i>Gsta4</i>   | AGACCACGGAGAGGCT       | CCTGACCACCTCAACATAGGG    |
| <i>Gstm3</i>   | CCCCAACTTTGACCGAAGC    | GGTGTCCATAACTTGGTTCTCCA  |
| <i>Gpx1</i>    | TGGACTGGTGGTGCTCG      | CGTCACTGGGTGTTGGC        |
| <i>Gpx2</i>    | GGGCTGTGCTGATTGAGA     | CGGACATACTTGAGGCTGTT     |
| <i>Gpx3</i>    | GGCTTCCCTTCCAACC       | AATTCTGCTCTTTCTCCC       |
| <i>Cox2</i>    | TGACCCCCAAGGTCAAATAT   | TGAACCCAGGTCCTCGCTTA     |
| <i>Inos</i>    | GCAAACCCAAGGTCTACGTTCA | GAGCACGCTGAGTACCTCATTG   |
| <i>Tnfa</i>    | CCACCACGCTCTTCTGTCTAC  | AGGGTCTGGGCCATAGAACT     |
| <i>Il6</i>     | TGATGCACTTGCAGAAAACA   | ACCAGAGGAAATTTTCAATAGGC  |
| <i>Enpp2</i>   | TCGAGGGCGAGAGAAGTTTA   | AAAAGAATGTCCCGGCTCTC     |
| <i>Lypla1</i>  | CCTTCACGGATTGGGAGATA   | GGGGCATGTGGACAGATGTA     |
| <i>Lpcat1</i>  | CACGAGCTGCGACTGAGC     | ATGAAAGCAGCGAACAGGAG     |
| <i>Lpcat2</i>  | ACCTGTTTCCGATGTCTCTGA  | CCAGGCCGATCACATACTCT     |
| <i>Lpcat3</i>  | AGCCTTAACAAGTTGGCGAC   | ATGCCGGTAAAACAGAGCC      |
| <i>Lpcat4</i>  | GAGTTACACCTCTCCGGCCT   | GGCCAGAGGAGAAAGAGGAC     |
| <i>Pcyt1a</i>  | AGCCCTATGTCAGGGTGACT   | GGCATGACCAGAGTGAAACA     |
| <i>Pcyt1b</i>  | ATAGAGCACACATGCCACA    | GGCAACGGTCAGTTTTTCAT     |
| <i>Chka</i>    | AAAGTGCTCTTGCGGCTCTA   | GACCTCTCTGCAAGAATGGC     |
| <i>Chkb</i>    | GCAGAGGTTCAGAAGGGTGA   | CCCCAGAAAAAGTGAGATGC     |
| <i>Ppara</i>   | CCCAAGGGAGGAATAGCTTCT  | CTCTGCGATGCGGTTCCAA      |
| <i>Cpt1b</i>   | TCTTCACTGAGTTCCGATGGG  | ACGCCAGAGATGCCTTTTCC     |
| <i>Cpt2</i>    | CAGCACAGCATCGTACCCA    | TCCCAATGCCGTTCTCAAAT     |
| <i>Acot1</i>   | ATGGCAGCAGCTCCAGACTT   | CCCAACCTCCAAACCATCAT     |
| <i>Acox1</i>   | CCGCCACCTTCAATCCAGAG   | CAAGTTCTCGATTTCTCGACGG   |
| <i>Cyp4a10</i> | CCAGGAACTGCATTGGGAAA   | GACCCTGGTAGGATCTGGCA     |
| <i>Tgfb</i>    | GGAGAGCCCTGGATACCAAC   | CAACCCAGGTCCTTCTAAA      |

**Table S-2. Identities of LPCs in mice.** The relative abundance of LPCs were decreased in TAA-induced mice whereas recovered by NME.

| No. | Observed<br><i>m/z</i> | Rt<br>(min) | Putative ion<br>form | Formula                                           | Mass error<br>(ppm) | Identification |
|-----|------------------------|-------------|----------------------|---------------------------------------------------|---------------------|----------------|
| 1   | 496.3395               | 10.79       | [M+H]                | C <sub>24</sub> H <sub>50</sub> NO <sub>7</sub> P | -0.35               | 16:0-LPC       |
| 2   | 494.3248               | 9.92        | [M+H]                | C <sub>24</sub> H <sub>48</sub> NO <sub>7</sub> P | 1.46                | 16:1-LPC       |
| 3   | 510.3552               | 11.44       | [M+H]                | C <sub>25</sub> H <sub>52</sub> NO <sub>7</sub> P | -0.34               | 17:0-LPC       |
| 4   | 524.3713               | 12.13       | [M+H]                | C <sub>26</sub> H <sub>54</sub> NO <sub>7</sub> P | 0.48                | 18:0-LPC       |
| 5   | 522.3568               | 11.13       | [M+H]                | C <sub>26</sub> H <sub>52</sub> NO <sub>7</sub> P | 2.68                | 18:1-LPC       |
| 6   | 520.3403               | 10.33       | [M+H]                | C <sub>26</sub> H <sub>50</sub> NO <sub>7</sub> P | 1.06                | 18:2-LPC       |
| 7   | 538.3885               | 12.87       | [M+H]                | C <sub>27</sub> H <sub>56</sub> NO <sub>7</sub> P | 3.37                | 19:0-LPC       |
| 8   | 550.3875               | 12.40       | [M+H]                | C <sub>28</sub> H <sub>56</sub> NO <sub>7</sub> P | 1.50                | 20:1-LPC       |
| 9   | 548.3711               | 11.48       | [M+H]                | C <sub>28</sub> H <sub>54</sub> NO <sub>7</sub> P | 0.10                | 20:2-LPC       |
| 10  | 546.3554               | 10.80       | [M+H]                | C <sub>28</sub> H <sub>52</sub> NO <sub>7</sub> P | 0.04                | 20:3-LPC       |
| 11  | 544.3395               | 10.36       | [M+H]                | C <sub>28</sub> H <sub>50</sub> NO <sub>7</sub> P | -0.45               | 20:4-LPC       |

**Table S-3. Identities of acylcarnitines in mice.** The relative abundance of acylcarnitines were increased in TAA-induced mice whereas recovered by NME.

| No. | Observed<br><i>m/z</i> | Rt<br>(min) | Putative ion<br>form | Formula                                         | Mass error<br>(ppm) | Identification |
|-----|------------------------|-------------|----------------------|-------------------------------------------------|---------------------|----------------|
| 1   | 246.1695               | 4.04        | [M+H]                | C <sub>12</sub> H <sub>23</sub> NO <sub>4</sub> | -1.53               | 5:0-carnitine  |
| 2   | 260.1854               | 4.97        | [M+H]                | C <sub>13</sub> H <sub>25</sub> NO <sub>4</sub> | -0.68               | 6:0-carnitine  |
| 3   | 288.2173               | 6.26        | [M+H]                | C <sub>15</sub> H <sub>29</sub> NO <sub>4</sub> | 1.47                | 8:0-carnitine  |
| 4   | 316.2482               | 7.31        | [M+H]                | C <sub>17</sub> H <sub>33</sub> NO <sub>4</sub> | 0.08                | 10:0-carnitine |
| 5   | 344.2803               | 8.26        | [M+H]                | C <sub>19</sub> H <sub>37</sub> NO <sub>4</sub> | 2.39                | 12:0-carnitine |
| 6   | 372.3109               | 9.18        | [M+H]                | C <sub>21</sub> H <sub>41</sub> NO <sub>4</sub> | 0.33                | 14:0-carnitine |
| 7   | 400.3421               | 10.10       | [M+H]                | C <sub>23</sub> H <sub>45</sub> NO <sub>4</sub> | 0.06                | 16:0-carnitine |
| 8   | 428.3755               | 10.98       | [M+H]                | C <sub>25</sub> H <sub>49</sub> NO <sub>4</sub> | 4.96                | 18:0-carnitine |
| 9   | 456.4051               | 12.02       | [M+H]                | C <sub>27</sub> H <sub>53</sub> NO <sub>4</sub> | 1.10                | 20:0-carnitine |
| 10  | 370.2977               | 8.70        | [M+H]                | C <sub>21</sub> H <sub>39</sub> NO <sub>4</sub> | 7.09                | 14:1-carnitine |
| 11  | 398.3269               | 9.48        | [M+H]                | C <sub>23</sub> H <sub>43</sub> NO <sub>4</sub> | 1.32                | 16:1-carnitine |
| 12  | 426.3578               | 10.31       | [M+H]                | C <sub>25</sub> H <sub>47</sub> NO <sub>4</sub> | 0.29                | 18:1-carnitine |
| 13  | 454.3901               | 11.12       | [M+H]                | C <sub>27</sub> H <sub>51</sub> NO <sub>4</sub> | 2.25                | 20:1-carnitine |

**Figure. S-1. NME recovered the lysophosphatidylcholines (A) and acylcarnitines (B) metabolism in mouse liver of TAA-induced toxicity.** \* $p < 0.05$  as compared to control group, \*\* $p < 0.01$  as compared to control group, \*\*\* $p < 0.001$  as compared to control group, # $p < 0.05$  as compared to TAA-treated group, ## $p < 0.01$  as compared to TAA-treated group, ### $p < 0.001$  as compared to TAA-treated group.

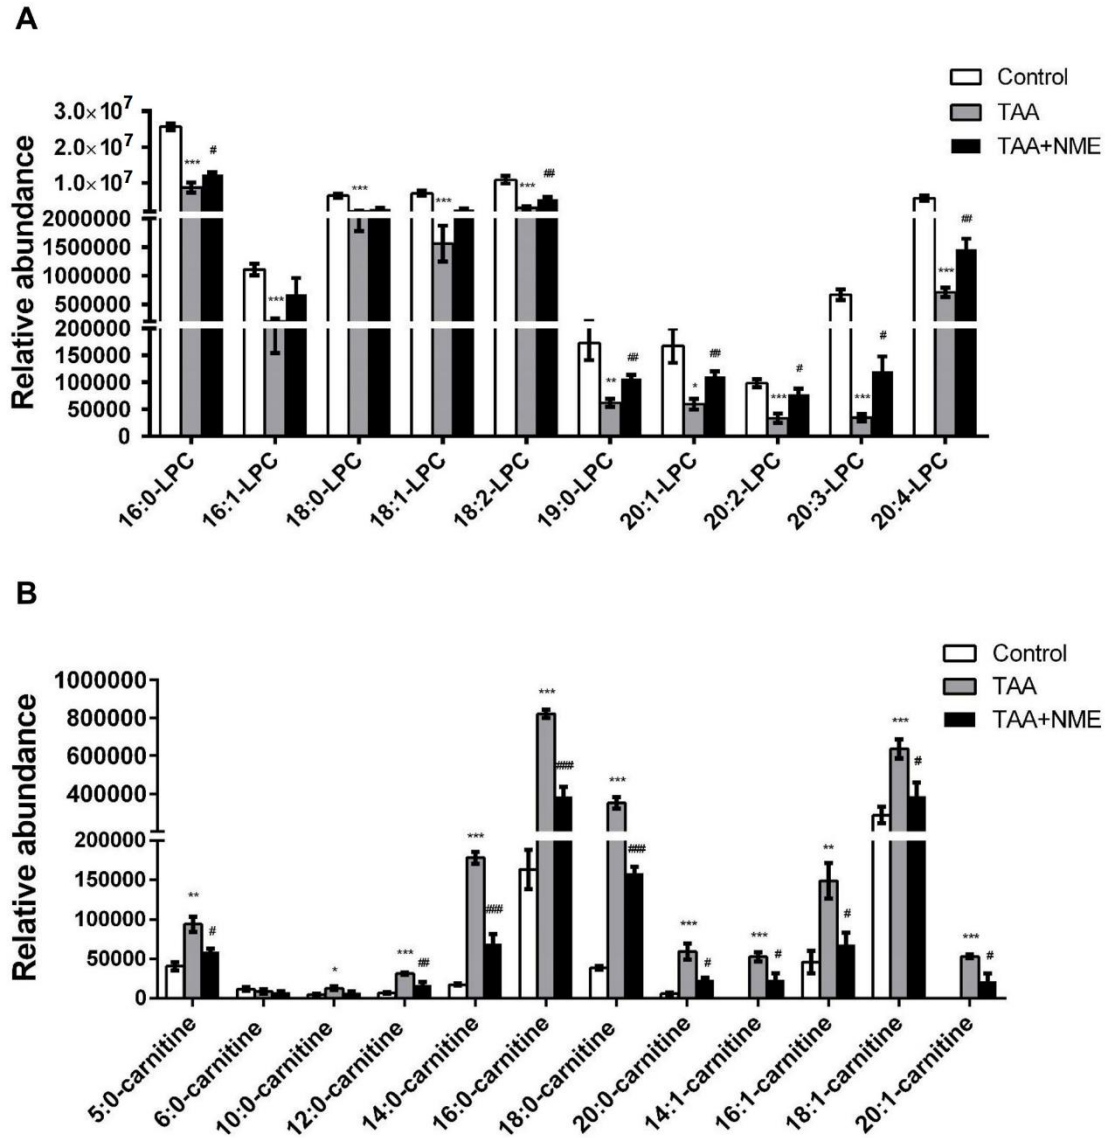

**Figure. S-2. Tandem MS spectrum of authentic compounds. (A) 18:0-LPC. (B) 18:1-LPC. (C) 16:0-carnitine. (D) 18:0-carnitine.**

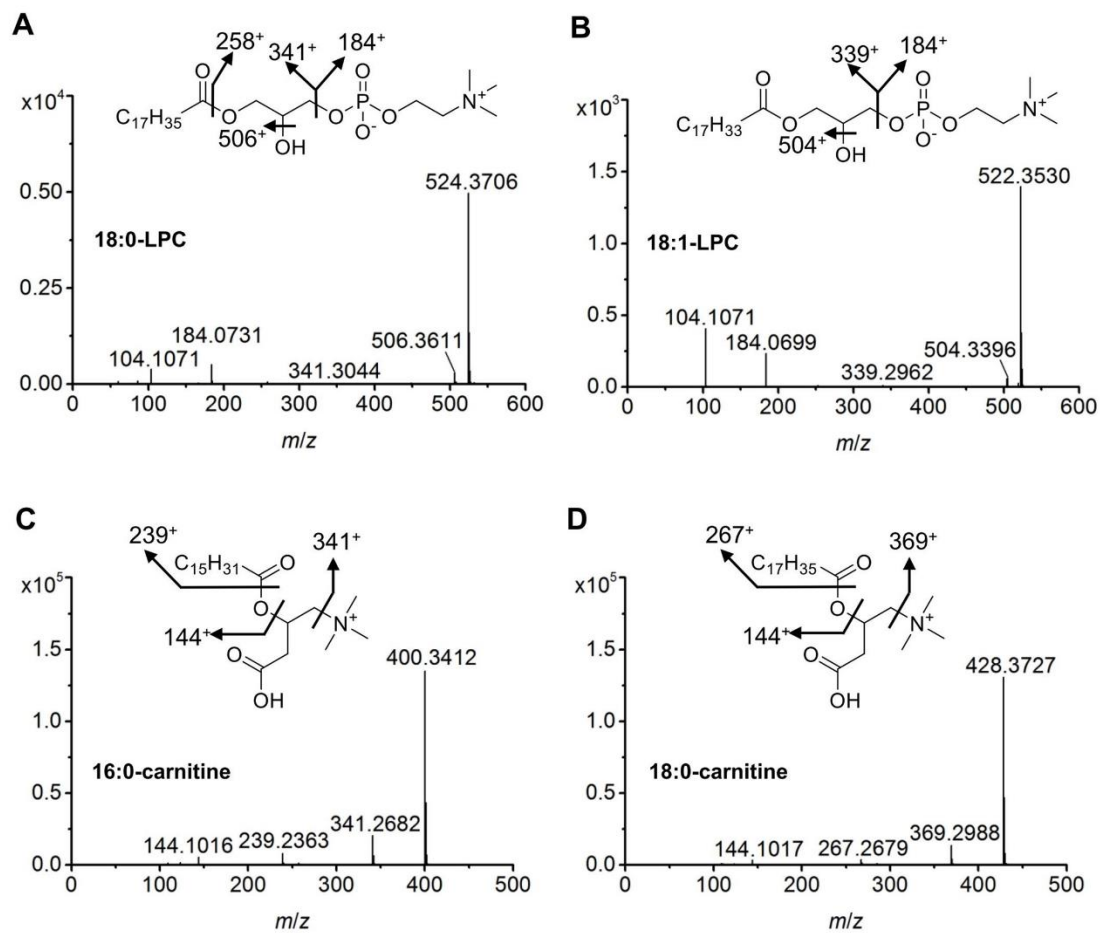

**Figure. S-3. (A) Hydrogen peroxide (H<sub>2</sub>O<sub>2</sub>) content in plasma. (B) Relative GSH abundance in plasma. H<sub>2</sub>O<sub>2</sub> content and the relative GSH abundance were slightly recovered by NME without significant difference. \**p* < 0.05 as compared to control group.**

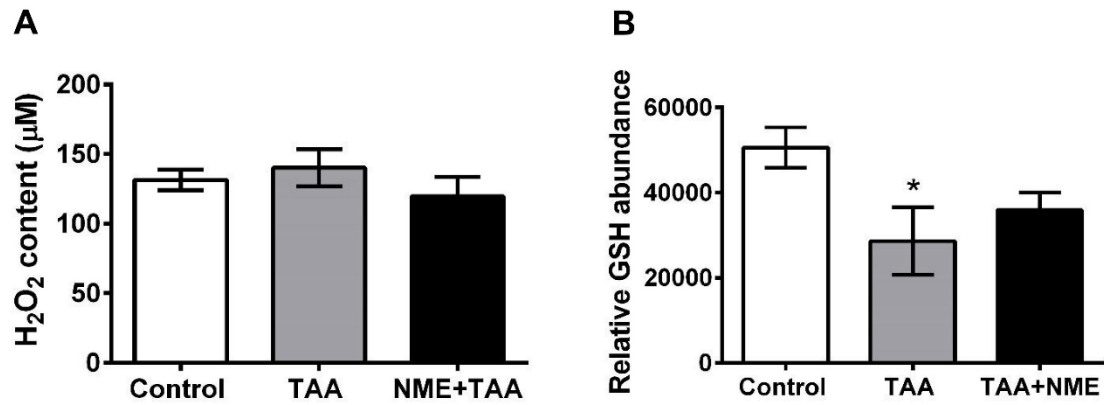

Supplement: NIHMS1036998-supplement-Supplementary_information.pdf [file NIHMS1036998-supplement-Supplementary_information.pdf]
